# Supplementary material for: A straightforward approach for bioorthogonal labeling of proteins and organelles in live mammalian cells, using a short peptide tag
Source: bioRxiv or medRxiv preprint supplement (doi:10.1101/708545), 2019-07-19
Supplement: Supplementary file [file media-1.pdf]

## Supplemental Information

### **A straightforward approach for bioorthogonal labeling of proteins and organelles in live mammalian cells, using a short peptide tag**

Inbar Segal<sup>1,2</sup>, Dikla Nachmias<sup>1,2</sup>, Eyal Arbely<sup>2,3</sup> and Natalie Elia<sup>1,2</sup>

<sup>1</sup> Department of Life Sciences, Ben-Gurion University of the Negev, Beer Sheva 84105, Israel

<sup>2</sup> National Institute for Biotechnology in the Negev (NIBN), Ben-Gurion University of the Negev, Beer Sheva 84105, Israel

<sup>3</sup> Department of Chemistry, Ben-Gurion University of the Negev, Beer Sheva 84105, Israel

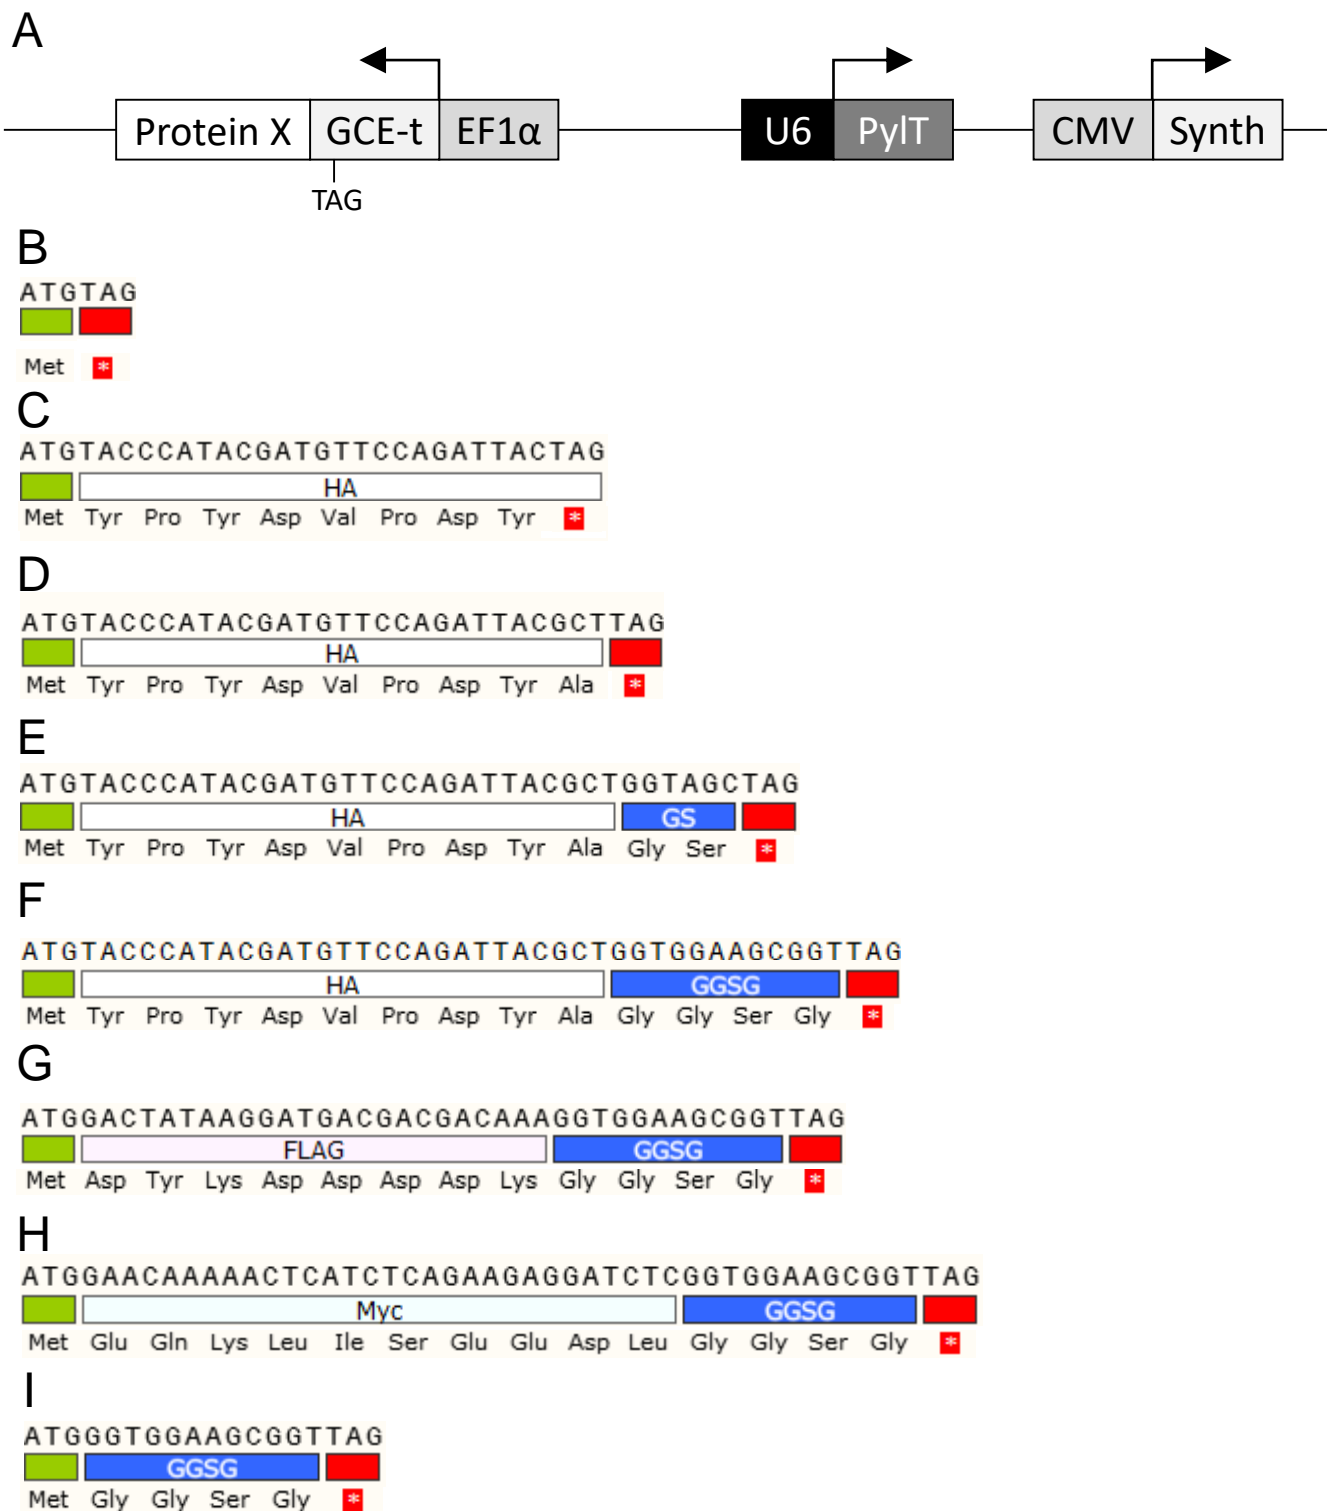

**Figure S1. Single expression vector maps and sequences of the designed linkers**  
*Related to Figure 2*

(A) Schematic representation of the genetic code expansion vector with *PyIT* gene and BCN-RS. (B-I) Nucleotide sequences of (B) Methionine-TAG, (C) HA\*-TAG (corresponds to tag 1 in Fig. 1 C), (D) HA-TAG (corresponds to tag 2 in Fig. 1 C), (E) HA-GS-TAG (corresponds to tag 3 in Fig. 1 C), (F) HA-GGSG-TAG (corresponds to tag 4 in Fig. 1 C), (G) Flag-GGSG-TAG, (H) Myc-GGSG-TAG, (I) GGSG-TAG. ATG represents beginning of ORF, ncAA incorporation site is at the TAG codon marked in red.

Met TAG  $\alpha$ -tubulin

$\alpha$ -tubulin-SiR

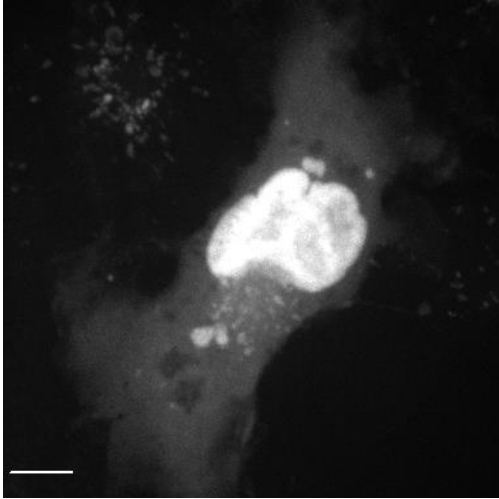

**Figure S2. Negative MT labeling with Met-TAG- $\alpha$ -tubulin**

*Related to Figure 2*

COS7 cells were transfected with pBUD-Pyl-RS that carries Methionine-TAG- $\alpha$ -tubulin, and labeled with SiR-Tet as described in the materials and methods. Note that there was no MT labeling using this Tag. Scale-bar: 10  $\mu$ m

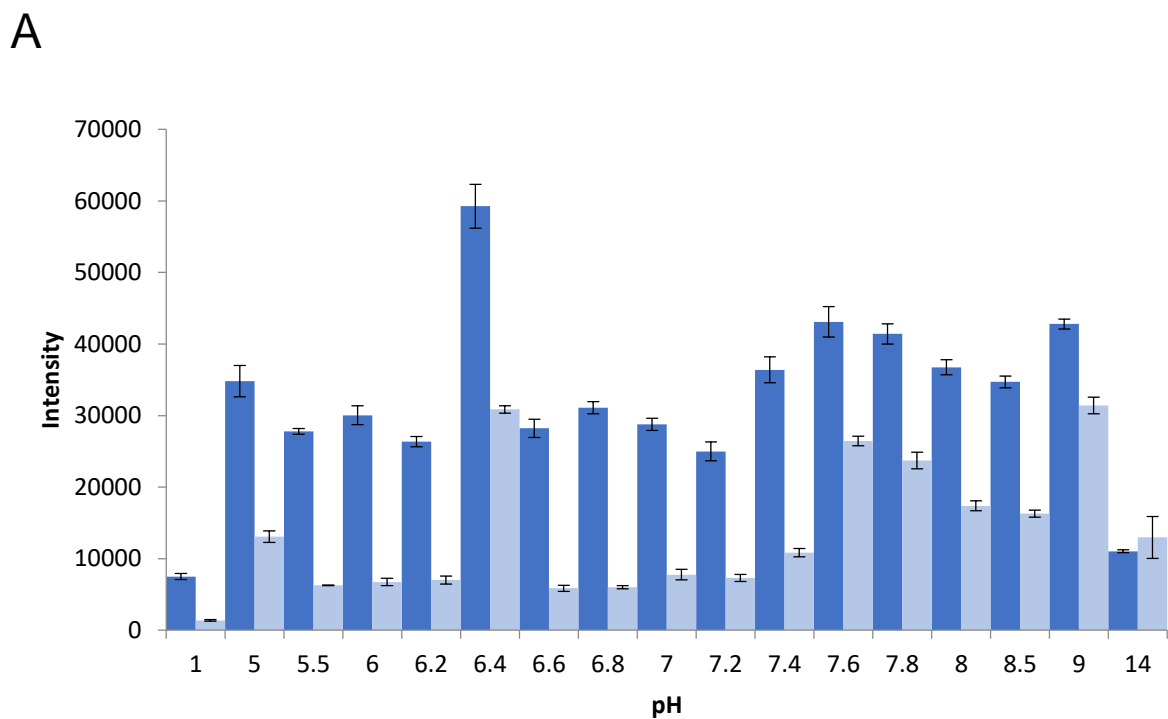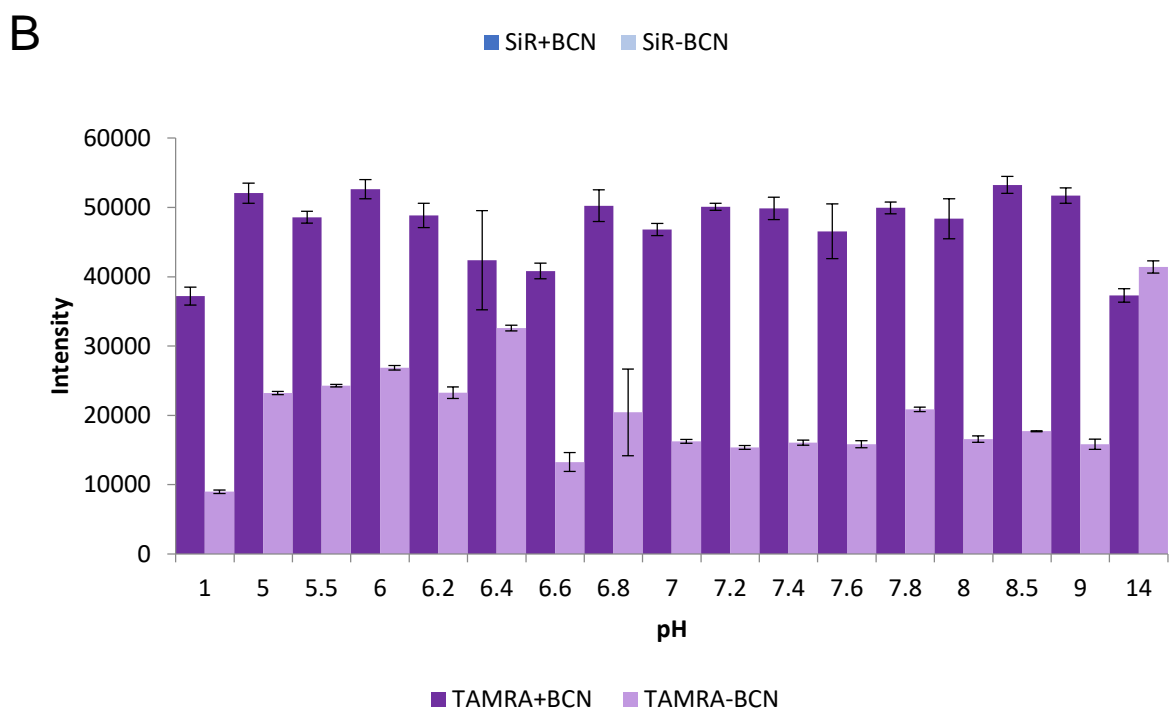

**Figure S3. pH sensitivity of Tetrazine conjugated FI-dyes**  
*Related to Figure 3*

In vitro analysis of SiR-Tet (A) and TAMRA-Tet (B) diluted in HEPES buffer in different pH, in the presence or absence of the nCAA BCN-Lysine as described in the supplementary methods (means  $\pm$  s.d.)

A

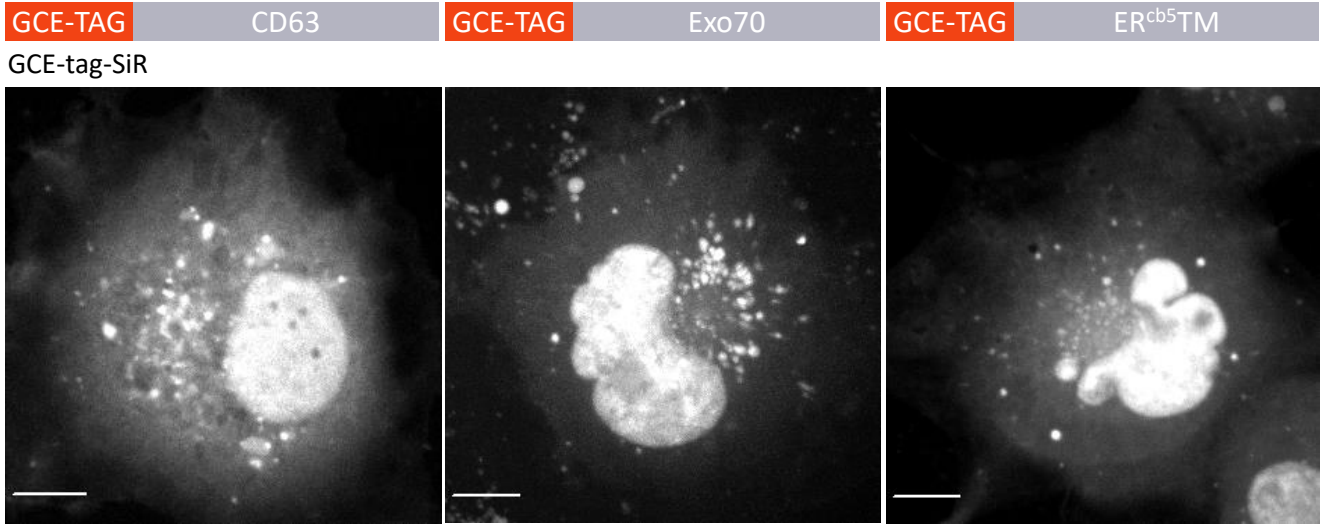

B

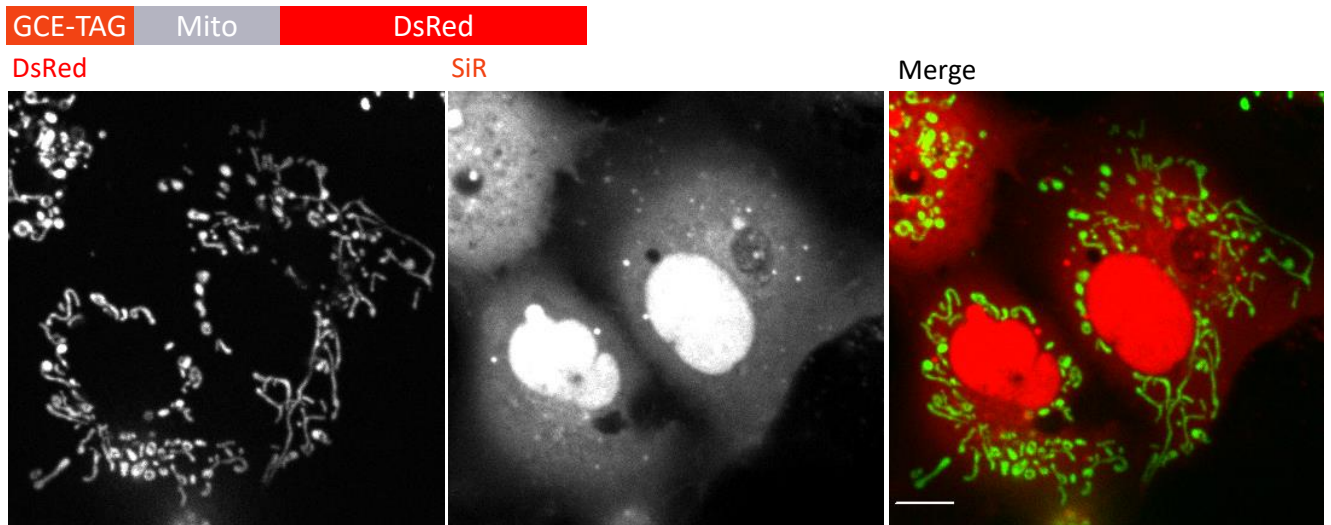

C

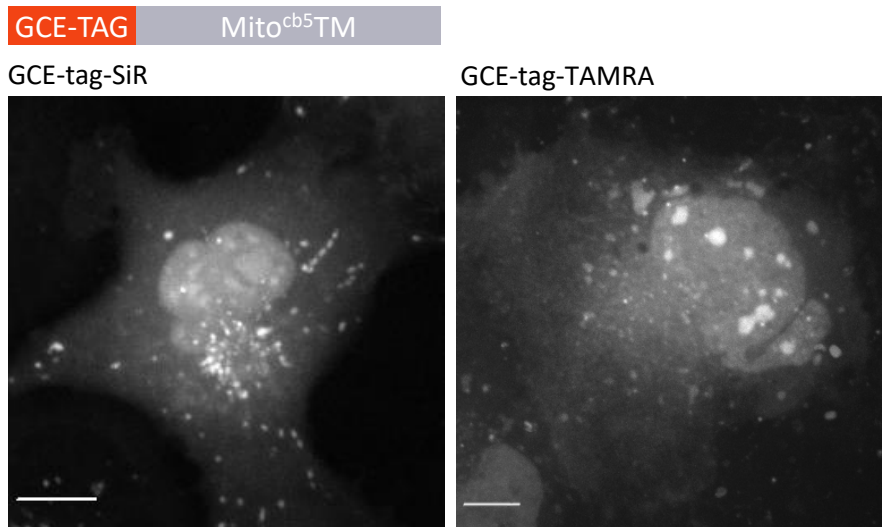

**Figure S4. Negative labeling of mitochondria, MVBs, Exosomes and ER using the GCE-tag.**  
*Related to Figure 4*

COS7 cells transfected with pBUD-Pyl-RS carrying (A) from left to right: GCE-tag-CD63, GCE-tag-Exo70 or GCE-tag-ER<sup>cb5</sup>TM, (B) GCE-tag-Mito-DsRed, or (C) GCE-tag-Mito<sup>cb5</sup>TM. Cells were labeled with SiR-Tet (A and B) or TAMRA-Tet (C), as described in the materials and methods. No specific labeling was obtained under any of these conditions. Scale-bar: 10  $\mu$ m.

**A**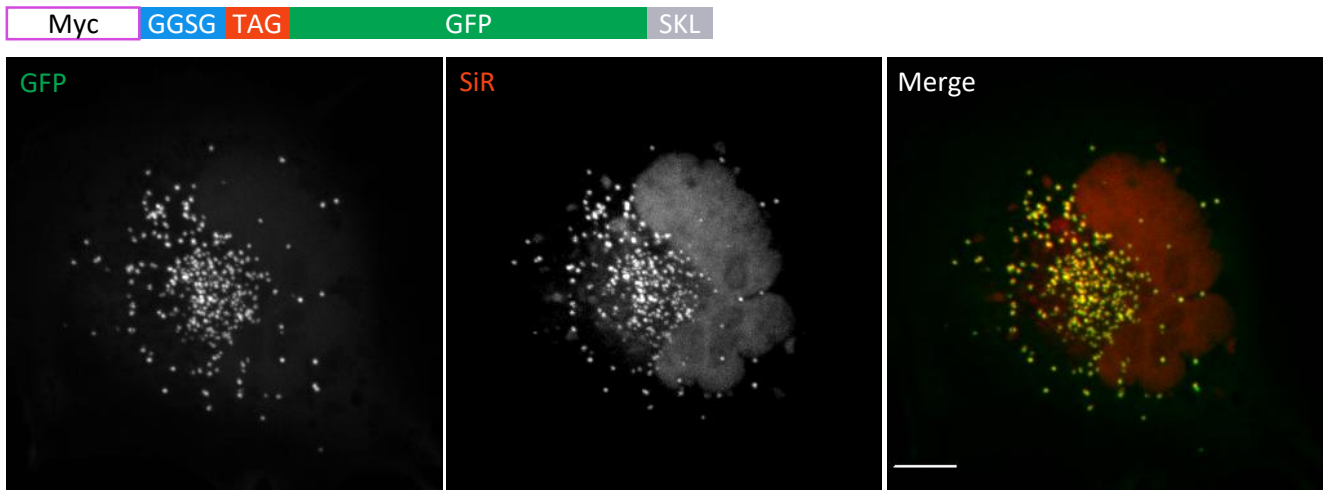**B**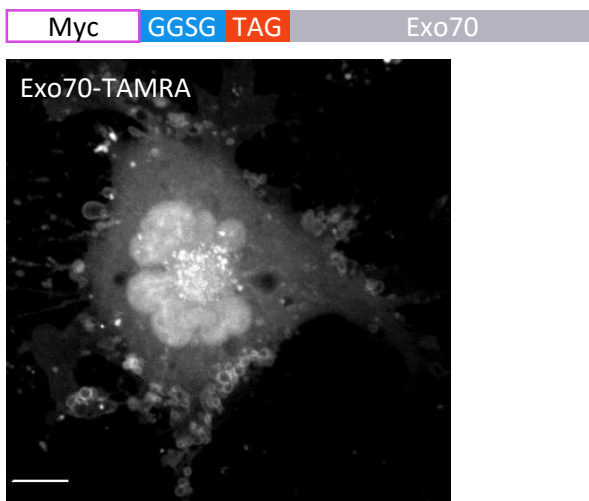**C**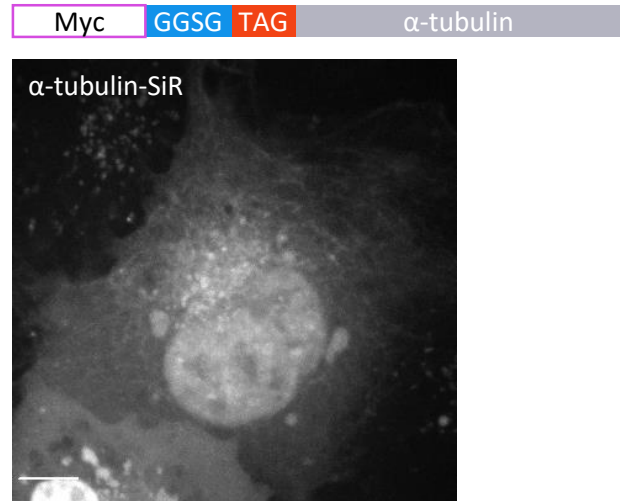

**Figure S5. Peroxisome, Exosome and MT labeling using Myc-GGSG-TAG as a bioorthogonal labeling tag**

*Related to Figure 5*

COS7 cells transfected with pBUD-Pyl-RS carrying either SKL-GFP (A), Exo70 (B), or  $\alpha$ -tubulin (C), all conjugated to the tag Myc-GGSG-TAG at the N-terminus, and labeled with (A and C) SiR-Tet or (B) TAMRA-Tet as described in the materials and methods, indicating that in some target proteins the HA epitope can be replaced by Myc. Scale-bar: 10  $\mu$ m.

| <b>Name</b>               | <b>Sequence</b>                                                                                                                                                                                                                                                                                                                                                                                                                                                                                                                                                                                                                                                                                               |
|---------------------------|---------------------------------------------------------------------------------------------------------------------------------------------------------------------------------------------------------------------------------------------------------------------------------------------------------------------------------------------------------------------------------------------------------------------------------------------------------------------------------------------------------------------------------------------------------------------------------------------------------------------------------------------------------------------------------------------------------------|
| <b>FRB-CAAX</b>           | ADKQKNGIKVNFKIRHNIEDGSVQLADHYQQNTPIGDGPVLLPDNHYLSTQSK<br>LSKDPNEKRDHMLLEFVTAAGITLGMDELYKSGLRSRAEMWHEGLEEASRL<br>YFGERNVKGMEFVLEPLHAMMERGPQTLKETSFNQAYGRDLMEAQEWCRK<br>YMKSGNVKDLTQAWDLYYHVFRRISKQRNSAVDSGLRSKLNPPDESGPGCM<br>SCKCVLS                                                                                                                                                                                                                                                                                                                                                                                                                                                                          |
| <b>Lamp1</b>              | AAPGARRPLLLLLLAGLAHSAPALFEVKDNNGTACIMASFSASFLTTYDAGHV<br>SKVSNMTPASAEVLKNSSSCGEKNASEPTLAITFGEGYLLKLTFTKNTTRYSV<br>QHMYFTYNLSDTQFFPNASSKGPDTVDSTTDIKADINKTYRCVSDIRVYMKNV<br>TIVLWDATIQAYLPSSNFSKEETRCPQDQPSPTTGPPSPPLVPTNPSVSKY<br>NVTGDNGTCLLASMALQLNITYMKKDNTTVTRAFNINPSDKYSGTCGAQLVTL<br>KVGNKSRVLELQFGMNATSSLFLLQGVQLNMTLPDAIEPTFSTSNYSLKALQA<br>SVGNSYKCNSEEHIFVSKALALNVFSVQVQAFRVESDRFGSVEECVQDGN<br>MLPIAVGGALAGLVLIVLIAYLIGRKRSHAGYQTI                                                                                                                                                                                                                                                                 |
| <b>CD63</b>               | AVEGGMKCVKFLLYVLLLAFCACAVGLIAGVGAQLVLSQTIIQGATPGSLLPV<br>VIIAVGVFLFLVAFVGGCGACKENYCLMITFAIFLSLIMLVEVAAAIAGYVFRDKV<br>MSEFNFRQOMENYPKNNHTASILDRMQADFKCCGAANYTDWEKIPSMK<br>NRVPDSCCINVTVGCGINFNEKAIHKEGCVKIGGWLRKNVLVAAAALGIAFV<br>EVLGIVFACCLVKSIRSGYEV                                                                                                                                                                                                                                                                                                                                                                                                                                                        |
| <b>ER<sup>cb5</sup>TM</b> | ESGGGSGGGGSGGGGSQSDKDVKYITLEEIKKHNSKSTWLILHHKVYDLTK<br>FLEHP                                                                                                                                                                                                                                                                                                                                                                                                                                                                                                                                                                                                                                                  |
| <b>Exo70</b>              | RRREIEDKCLKQEEETLSFIRDSLEKSDQLTKNMVSILSSFESRLMKLENSIIPVH<br>KQTENLQRLQENVEKTLSCLDHVISYYHVASDTEKIIREGPTGRLEEYLGSM<br>KIQKAVEYFQDNSPDSPELNKVKLLFERGKESLESEFRSLMTRHSKVISPVLV<br>DLISADDELEVQEDVVLEHLPESVLQDVIRISRWLVEYGRNQDFMNVYYQIRS<br>SQLDRSIKGLKEHFRKSSSSSGVPYSPAIPNKRKDTPTKKPIKRPGRDDMLDV<br>ETDAYIHCVSFAVRLAQSEYQLLMGIIPEHHQKKTDFSLIQDALDGLMLEGENI<br>VSAARKAIRHDFSTVLTVPILRHLKQTKPEFDQVLQGTAASTKNKLPGLITSM<br>ETIGAKALEDFAFDNIKNDPDKEYNMPKDGTVHELTSNAILFLQQLLDFQETAGA<br>MLASQETSSSATSYNSEFSKRLSTYICKVLGNLQLNLLSKSKVYEDPALSAIF<br>LHNNYNYILKSLEKSELIQLVAVTQKTAERSYREHIEQQIQTYQRSWLKVTDYIA<br>EKNLPVFQPGVKLRDKERQMIKERFKGFNDGLEELCKIQKAWAIPDTEQRDKI<br>RQAQKSIVKETYGAFLHRYSSVPFTKNPEKIKYRVEQVGDMLDRLFD TSA |

**Table S1. Sequences of organelle markers used in this work**  
*Related to Figure 3 and Table 1*

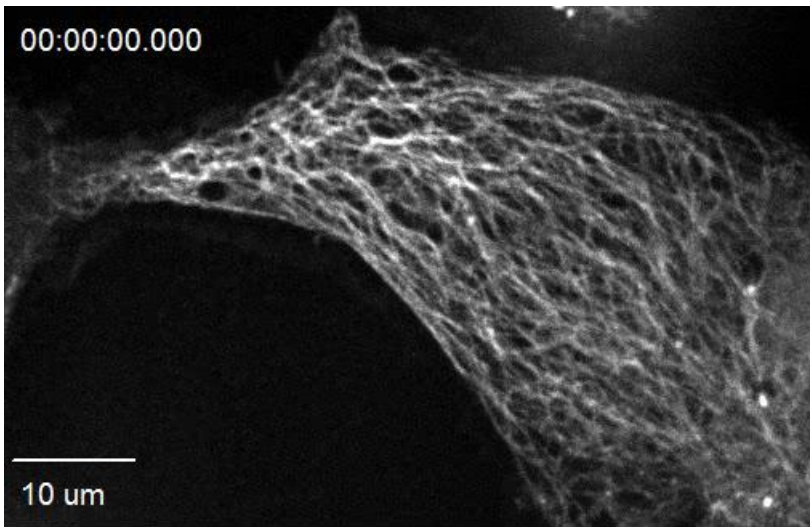

**Video S1.**

Microtubule dynamics recorded in COS7 cells expressing GCE-tag- $\alpha$ -tubulin and labeled with SiR-Tet. Cells were recorded for approximately 1 min with 4 s intervals. Scale-bar: 10  $\mu$ m.



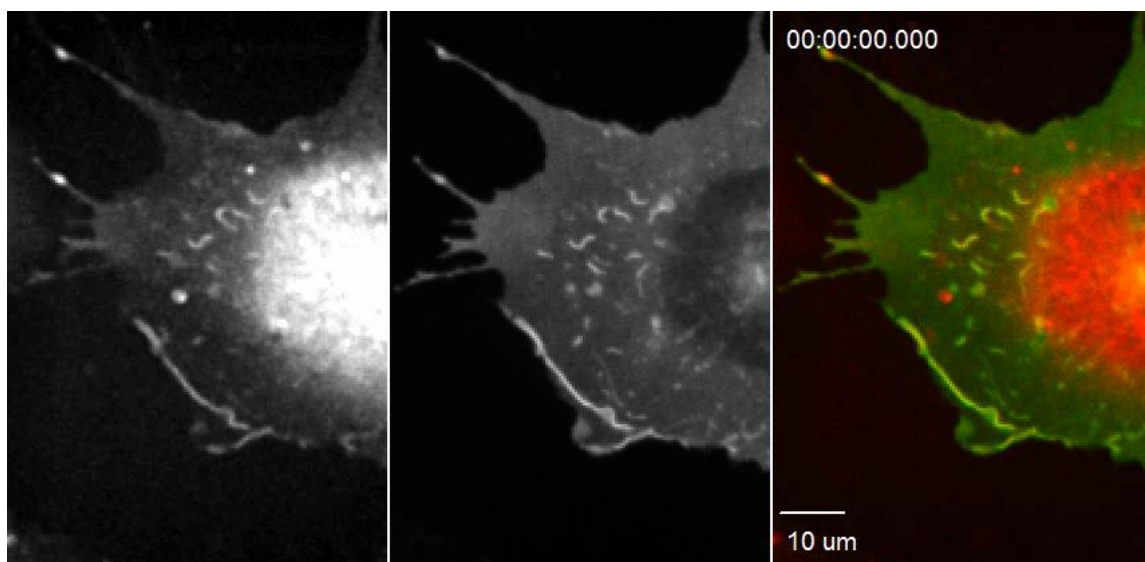

**Video S2.**

To induce plasma membrane dynamics, COS7 cells expressing GCE-tag-GFP-CAAX labeled with SiR-Tet, were incubated in serum-free DMEM for 6h and then washed with DMEM. Cells were recorded for 5 min with 5.5s intervals. Left panel: 640 (SiR, red) channel, middle panel: 488 (GFP, green) channel. Scale-bar: 10  $\mu\text{m}$ .

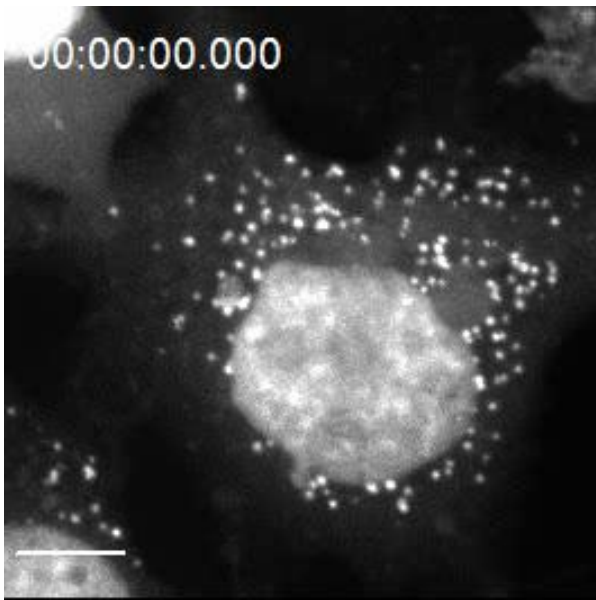

**Video S3.**

Peroxisome dynamics recorded in COS7 cells expressing GCE-tag-GFP-SKL and labeled with SiR-Tet. Cells were recorded for 5 min with 11 s intervals. Only SiR channel is shown. Scale-bar: 10  $\mu$ m.

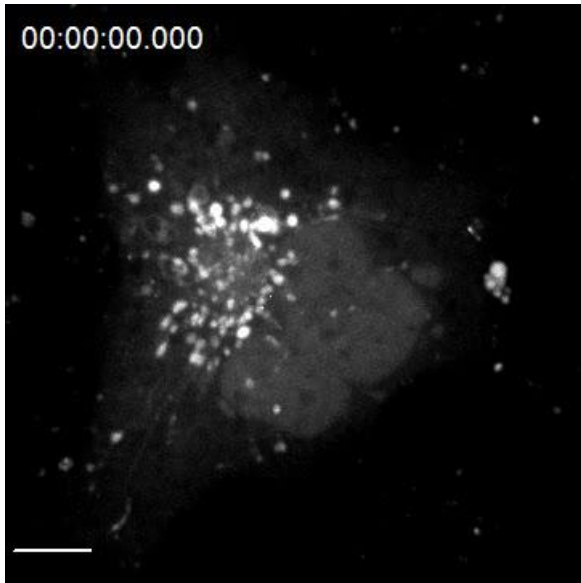

**Video S4.**

MVB dynamics recorded in COS7 cells expressing GCE-tag-CD63 and labeled with TAMRA-Tet. Cells were recorded for 5 min with 4 s intervals. Scale-bar: 10  $\mu$ m.

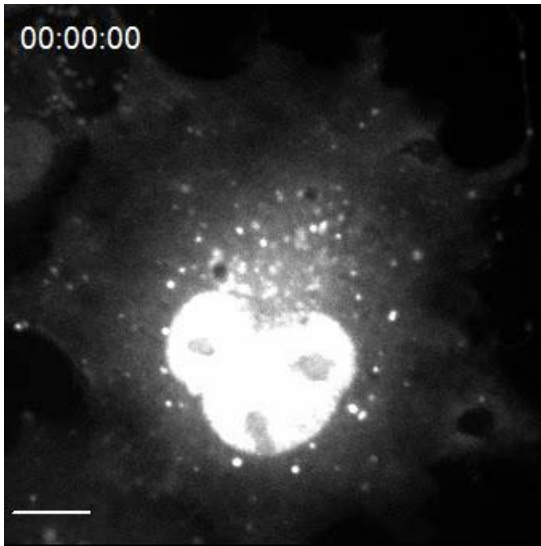

**Video S5.**

Lysosome inhibition recorded in COS7 cells expressing GCE-tag-Lamp1 and labeled with SiR-Tet. Cells were imaged for 3 h in the presence of the lysosome inhibitor chloroquine (120  $\mu\text{M}$ ), at 10 min intervals. Scale-bar: 10  $\mu\text{m}$ .

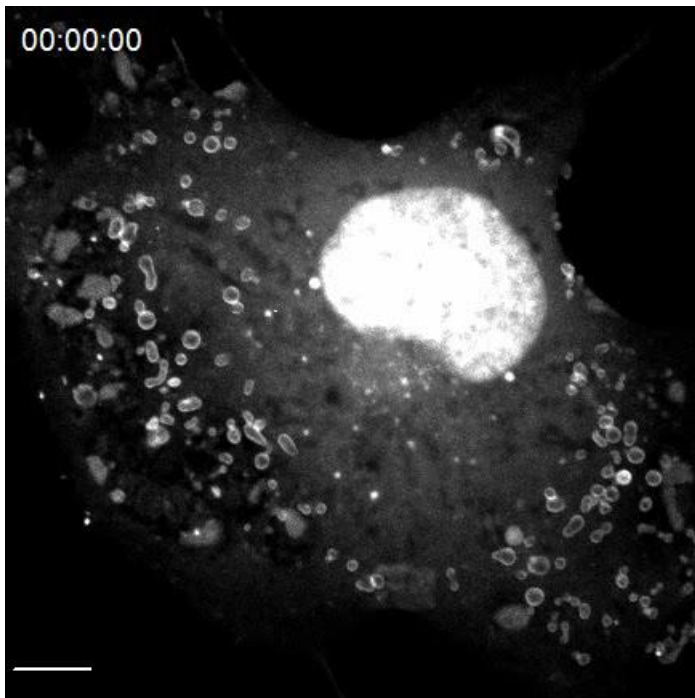

**Video S6.**

Exosomes dynamics recorded in COS7 cells expressing GCE-tag-Exo70 and labeled with TAMRA-Tet. Cells were recorded for 30 s with 1 s intervals. Scale-bar: 10  $\mu$ m.

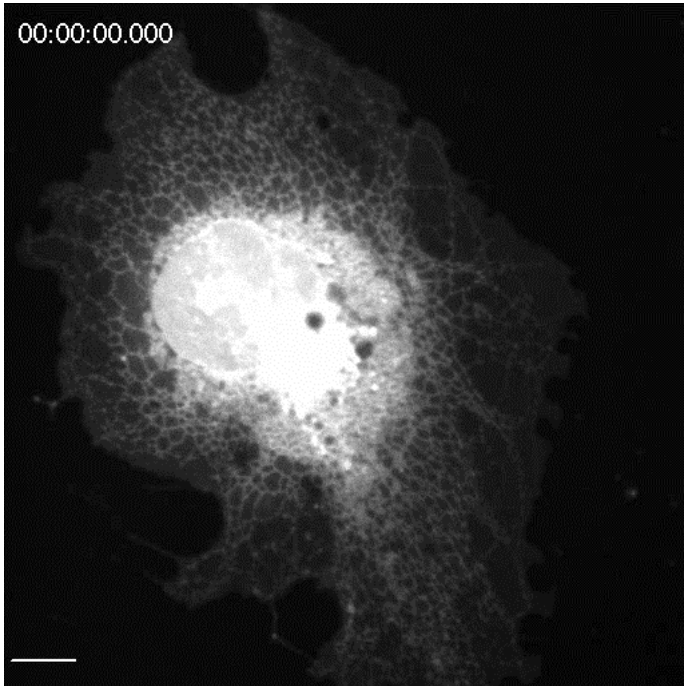

**Video S7.**

FRAP analysis of COS7 cells expressing GCE-tag-ER<sup>cb5</sup>TM labeled with TAMTA-Tet. Cells were imaged for 2 min with 2 s intervals. Photo-bleaching was performed after 4 baseline timepoints (12 s). Scale-bar: 10  $\mu$ m.

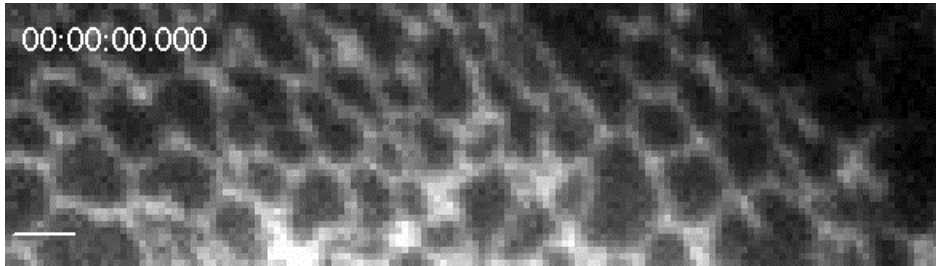

**Video S8.**

Zoomed-in video of the bleached ROI in cells expressing GCE-tag-ER<sup>cb5</sup>TM labeled with TAMTA-Tet (taken from supplementary video 7). Cells were imaged for 2 min with 2 s intervals. Photo-bleaching was performed after 4 baseline timepoints (12 s). Scale-bar: 2  $\mu$ m.
